# Supplementary material
Source: PubMed Central journal article supplement (PMC4031940)
Supplement: supp_M045500_jlr.M045500-1.pdf [file supp_M045500_jlr.M045500-1.pdf]

## **Supplemental data**

### *Table of Content*

## **Supplemental data Figures**

Supplemental data Figure I Representative Palmitoyl-CoA dilution series

Supplemental data Figure II Representative Palmitoyl-CoA measurement in mouse livers

## **Supplemental data Tables**

Supplemental data Table I Patients

Supplemental data Table II Primer and conditions

Supplemental data Table III Antibodies and conditions

# Supplemental data Figures

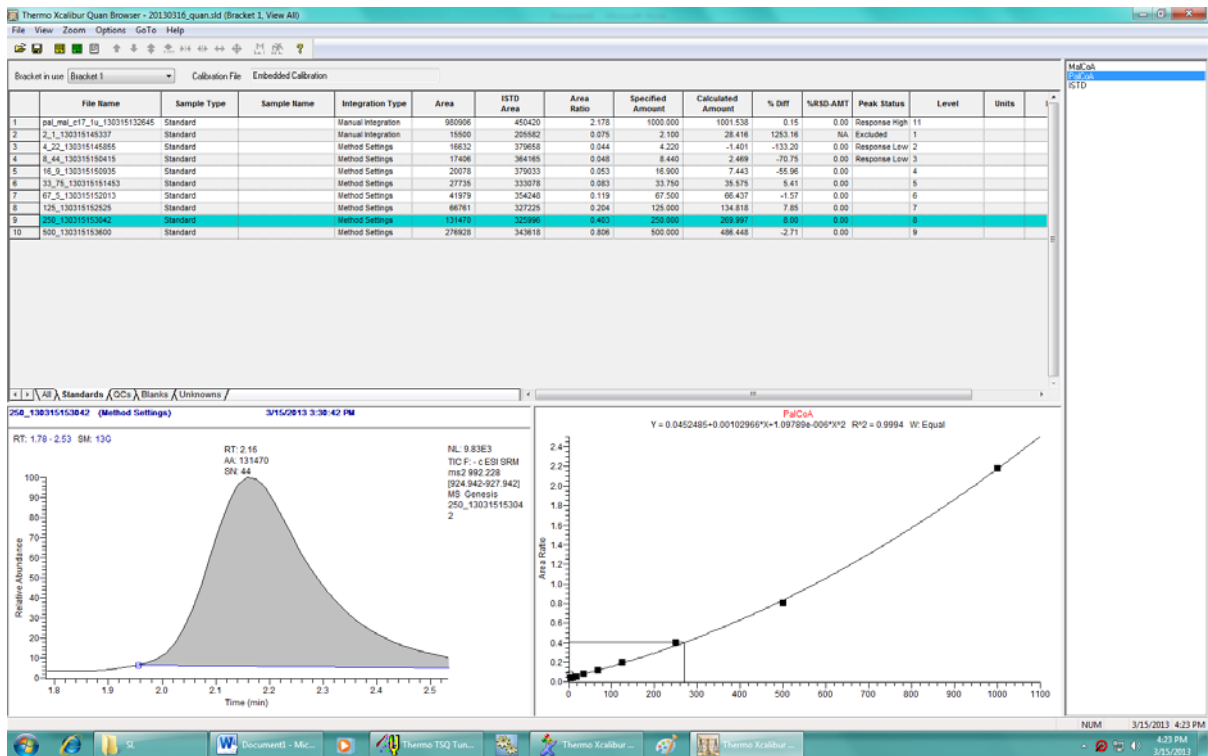

Supplemental data Figure I: Representative Palmitoyl-CoA dilution series

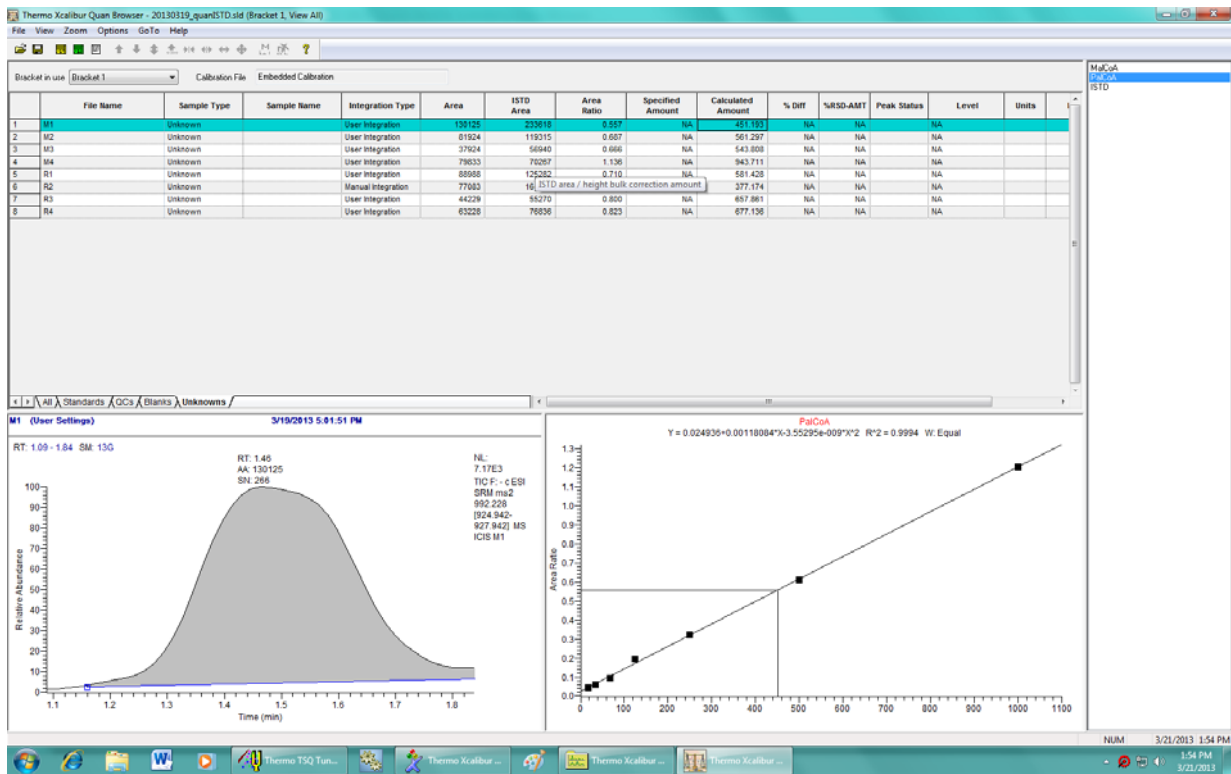

Supplemental data Figure II: Representative palmitoyl-CoA measurement in mouse livers

## Supplemental data Tables

| Nr. | diagnosis                                           |
|-----|-----------------------------------------------------|
| 1   | cirrhosis, hepatitis                                |
| 2   | cirrhosis, hepatitis                                |
| 3   | liver cirrhosis,primary biliary cirrhosis           |
| 4   | cirrhosis                                           |
| 5   | cirrhosis, hepatitis                                |
| 6   | cirrhosis, hepatitis                                |
| 7   | liver cirrhosis,hepatitis C virus                   |
| 8   | liver cirrhosis,hepatitis C virus                   |
| 9   | liver cirrhosis,hepatitis B virus                   |
| 10  | liver cirrhosis, alcoholic liver                    |
| 11  | liver cirrhosis,hepatitis B virus                   |
| 12  | cirrhosis,viral hepatitis                           |
| 13  | liver cirrhosis, alcoholic hepatitis                |
| 14  | liver cirrhosis,hepatitis C virus                   |
| 15  | liver cirrhosis,Budd-chiary-S.                      |
| 16  | liver cirrhosis,hepatitis C virus                   |
| 17  | liver fibrosis,liver cirrhosis                      |
| 18  | liver cirrhosis,liver cirrhosis alcoholic           |
| 19  | liver cirrhosis                                     |
| 20  | liver cirrhosis,viral hepatitis                     |
| 21  | liver cirrhosis,hepatitis C virus                   |
| 22  | liver cirrhosis                                     |
| 23  | liver cirrhosis,hepatitis B virus                   |
| 24  | liver cirrhosis                                     |
| 25  | cirrhosis,hepatitis C virus                         |
| 26  | liver cirrhosis,hepatitis B virus                   |
| 27  | liver cirrhosis, cryptogen.,viral hepatitis         |
| 28  | liver cirrhosis,viral hepatitis                     |
| 29  | liver cirrhosis,viral hepatitis                     |
| 30  | liver cirrhosis                                     |
| 31  | liver cirrhosis,alcoholic liver cirrhosis           |
| 32  | liver cirrhosis                                     |
| 33  | liver cirrhosis,hepatitis B virus,hepatitis C virus |
| 34  | liver cirrhosis,hemachromatome                      |
| 35  | liver cirrhosis, alpha-1 antitrypsin deficiency     |

Supplemental data Table I: Patients / Diagnosis

| gene     | forward primer sequence 5'-3' | reverse primer sequence 5'-3' | amplicon size [bp] | gene bank accession number | primer amount [ $\mu$ l/reaction [10 mM]] | annealing temp. [°C] |
|----------|-------------------------------|-------------------------------|--------------------|----------------------------|-------------------------------------------|----------------------|
| huACTB   | TGCGTGACATTAAGGAGAAG          | GTCAGGCAGCTCGTAGCTCT          | 107                | NM_001101                  | 0.4                                       | 60                   |
| huACACA  | TCCGACCAGTAATCACTTTGC         | GGGAACGTTATCCCCAAACC          | 139                | NM_198834.1                | 0.5                                       | 60                   |
| huELOVL6 | CACTGTGAGCTGAAAAGGGAG         | GTGTGAAGTCAAACAGGGAGGG        | 104                | NM_024090.2                | 0.4                                       | 60                   |
| huFASN   | ACTTCCCCAACGGTTCAGGTTC        | GCGTCTTCCACACTATGCTCAG        | 150                | NM_004104.4                | 0.4                                       | 62                   |
| huGCK    | CCTTACGCTCCAAGGCTACA          | TCTCTCCGAGGGGCTAAGAG          | 93                 | NM_033508.1                | 0.4                                       | 60                   |
| huIGF2   | GGACTTGAGTCCCTGAACCA          | TGAAAATTCCCGTGAGAAGG          | 100                | NM_000612                  | 0.5                                       | 56                   |
| huMLXIPL | CCCAAGTGAAGAATTTCAAAG         | CTCTTCCTCCGCTTCACATACT        | 110                | NM_032952.2                | 0.4                                       | 59                   |
| huNR1H3  | TCATCAACCCCATCTTCGAG          | GCAATGAGCAAGGCAAACCTC         | 79                 | NM_005693                  | 0.2                                       | 60                   |
| hup62    | GTTCCCGCATCATCACTTTAT         | GAATCTCGCCAGCTGTTTGA          | 117                | AF057352                   | 0.4                                       | 62                   |
| huPKLR   | CCCACACTGAAAGCATGTCTG         | CTCCTGGAGCCCCAATCAG           | 114                | NM_000298.5                | 0.4                                       | 60                   |
| huPPARA  | TGCGTAGAAGAGCCAGAAA           | GTTGACTGGACGGAGCTGAG          | 137                | NM_001001928.2             | 0.2                                       | 60                   |
| huSCD    | GCCAATTCCTCTCCACTGCTG         | AAGTTCGCTCTTAGAAGCTGCC        | 80                 | NM_005063.4                | 0.4                                       | 60                   |
| huSREBF1 | CCATGGATTGCACTTTTCGAA         | GGCCAGGGAAGTCACTGTCTT         | 66                 | NM_001005291.2             | 0.4                                       | 60                   |
| mu18s    | GTAACCCGTTGAACCCATT           | CCATCCAATCGGTAGTAGCG          | 151                | NR_003278.1                | 0.4                                       | 58                   |
| muMLXIPL | CTGGGGACCTAACAGGAGC           | GAAGCCACCCTATAGCTCCC          | 166                | NM_021455.4                | 0.5                                       | 60                   |
| muF4/80  | CTTTGGCTATGGGCTTCCAGTC        | GCAAGGAGGACAGAGTTTATCGT<br>G  | 165                | NM_010130                  | 0.3                                       | 60                   |
| muPPARA  | CCTTCCTGTGAACTGACG            | CCACAGAGCGCTAAGCTGT           | 77                 | NM_001113418.1             | 0.5                                       | 60                   |

Supplemental data Table II: Primer and conditions

| <b>primary antibodies (anti-human/mouse)</b> | <b>dilution buffer</b>        | <b>temp.</b> | <b>Time</b> | <b>manufacturer</b>         |
|----------------------------------------------|-------------------------------|--------------|-------------|-----------------------------|
| anti-p62, rabbit IgG                         | 1:1,000 in PBST + 5% BSA      | RT           | 2 h         | selfmade; Zhang et al. 1999 |
| anti-alpha-tubulin, mouse IgG                | 1:1,000 in PBST + 5% dry milk | RT           | 2 h         | Sigma Aldrich               |
| anti-SREBF1, mouse IgG                       | 1:200 in RBB                  | RT           | 2 h         | Abcam                       |
| anti-PPARA; rabbit IgG                       | 1:1,000 in PBST + 5% dry milk | 4°C          | overnight   | Abcam                       |
| anti-ELOVL6, rabbit IgG                      | 1:1,000 in PBST + 5% BSA      | 4°C          | overnight   | Sigma Aldrich               |
| anti-FASN, rabbit IgG                        | 1:1,000 in RBB                | RT           | 2 h         | Cell Signaling Technology   |
| anti-lamin A/C, rabbit IgG                   | 1:1,000 in RBB                | 4°C          | overnight   | Cell Signaling Technology   |

Supplemental data Table III: Antibodies and conditions
